# Supplementary material for: Single-channel dereverberation by feature mapping using cascade neural networks for robust distant speaker identification and speech recognition
Source: Springer Nature journal article supplement (doi:10.1186/1687-4722-2014-13), 2014-04-10
Supplement: 13636_2013_110_MOESM5_ESM.pdf [file 13636_2013_110_MOESM5_ESM.pdf]

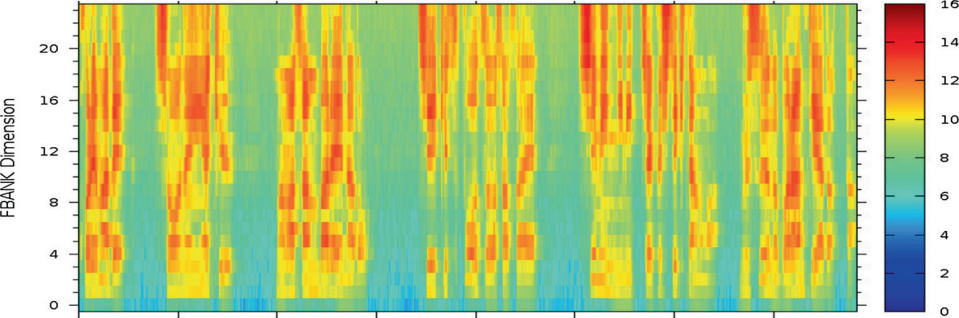

(A) Clean feature vectors,  $S(t)$ .

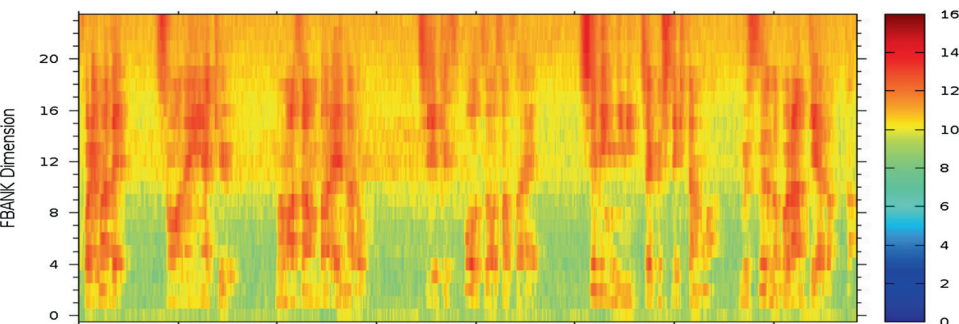

(B) Reverberant feature vectors,  $Y(t)$ .

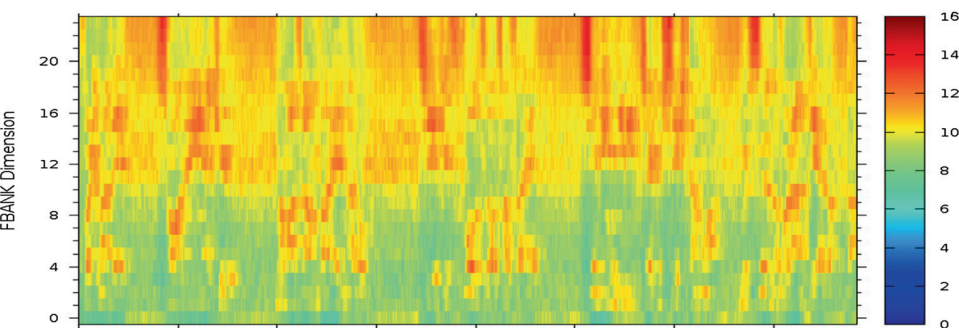

(C) Dereverberated feature vectors,  $\bar{S}(t)$ .

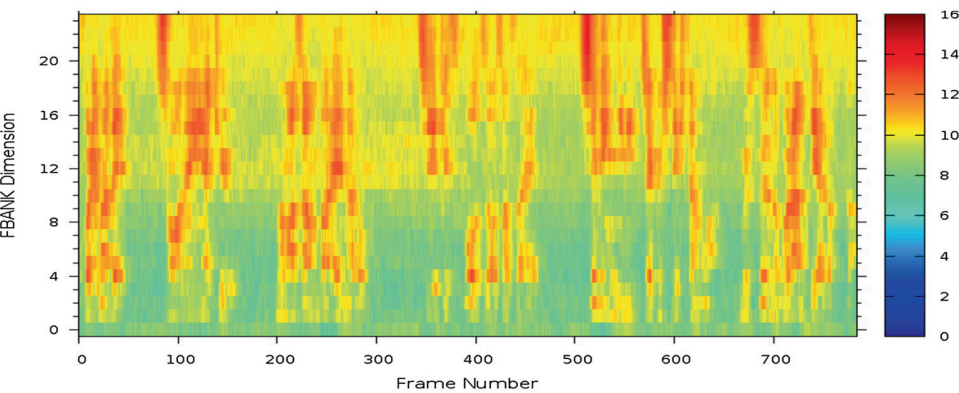

(D) Denormalized dereverberated feature vectors,  $\hat{S}(t)$ .
