# Supplementary material for: Single-channel dereverberation by feature mapping using cascade neural networks for robust distant speaker identification and speech recognition
Source: Springer Nature journal article supplement (doi:10.1186/1687-4722-2014-13), 2014-04-10

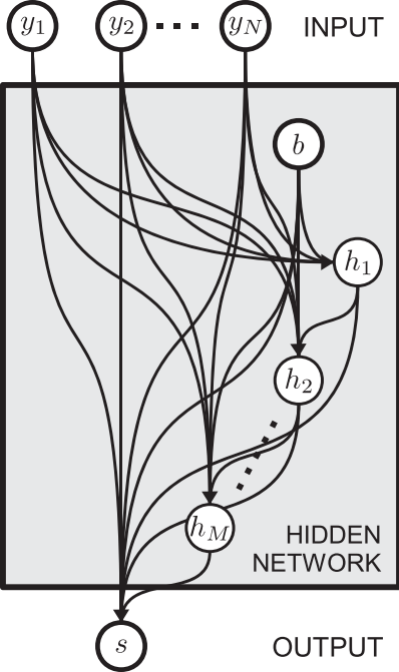

Supplement: 13636_2013_110_MOESM7_ESM.pdf [file 13636_2013_110_MOESM7_ESM.pdf]
